# Supplementary material for: Increased alignment sensitivity improves the usage of genome alignments for comparative gene annotation
Source: PubMed Central journal article supplement — Nucleic Acids Res. 2017 Jun 21;45(14):8369–77. doi: 10.1093/nar/gkx554 (PMC5737078; doi:10.1093/nar/gkx554), 2017-06-21
Supplement: gkx554_supp.pdf [file gkx554_supp.pdf]

Supplementary Material for  
Increased alignment sensitivity improves the usage of genome alignments  
for comparative gene annotation

Virag Sharma<sup>1,2</sup> and Michael Hiller<sup>1,2\*</sup>

<sup>1</sup>Max Planck Institute of Molecular Cell Biology and Genetics, Dresden, Germany

<sup>2</sup>Max Planck Institute for the Physics of Complex Systems, Dresden, Germany

\*To whom correspondence should be addressed:

Michael Hiller

Computational Biology and Evolutionary Genomics, Max Planck Institute of Molecular Cell Biology and Genetics & Max Planck Institute for the Physics of Complex Systems, Dresden, Germany.

Tel: +49 351 210 2781

Fax: +49 351 210 1209

Email: [hiller@mpi-cbg.de](mailto:hiller@mpi-cbg.de)

The Supplementary Material contains

- Figure 1
- Tables 1 – 2

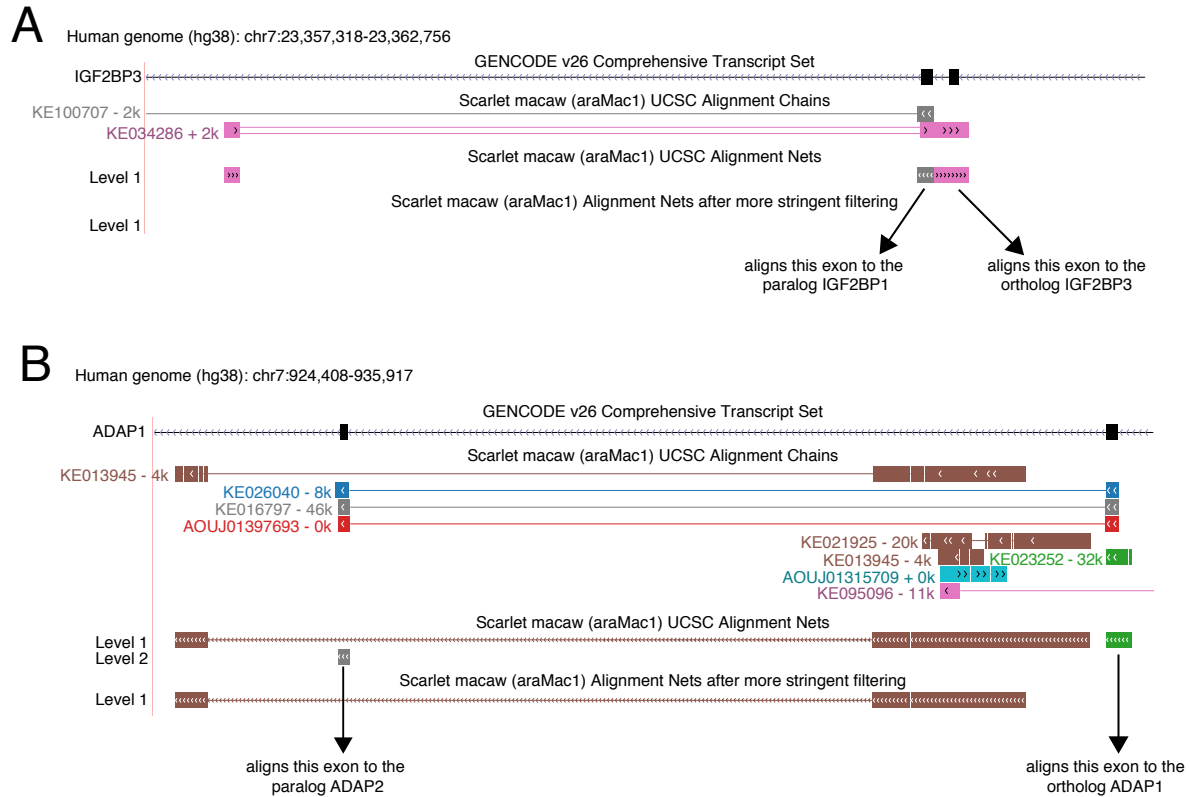

**Supplementary Figure 1:** Scarlet macaw alignments that are discarded by our more stringent filters contain paralogous exon alignments that would lead to incorrect gene annotations.

The examples in (A) and (B) illustrate why our more stringent filtering approach results in fewer annotated exons and genes for fragmented genome assemblies (Figure 5, main text) that result in short co-linear alignment nets. The panels show UCSC genome browser screenshots of the human genome and the co-linear alignment chains and nets to the scarlet macaw. Each box in an alignment chain or net represents aligning sequence.

(A) Our more stringent net filter thresholds remove alignments to two exons of *IGF2BP3*, contributing to the lower number of annotated exons in the scarlet macaw. However, the grey alignment likely aligns an exon of the paralog *IGF2BP1*, as revealed by aligning the respective scarlet macaw sequence to the well annotated chicken genome. Thus, removing this net increases the specificity in the gene annotation by avoiding a mis-annotation. The pink alignment of the second exon likely aligns the orthologous gene, illustrating that these fragmented assemblies result in short chains and nets that make it hard to distinguish orthologous and paralogous alignments.

(B) Another example illustrating short alignment chains and nets in the scarlet macaw. The green net that spans only a single exon is likely an alignment to the ortholog of *ADAP1*. However, the grey alignment aligns the upstream exon to the paralog *ADAP2*.

| Assembly   | Species                  | Scientific name                | Net type          | Alignment computed      | % of human (hg38) genome in aligning blocks containing this species | Notes                                                 |
|------------|--------------------------|--------------------------------|-------------------|-------------------------|---------------------------------------------------------------------|-------------------------------------------------------|
| hg38       | Human                    | Homo sapiens                   | Reference species | -                       | -                                                                   |                                                       |
| panTro4    | Chimp                    | Pan troglodytes                | syntenic          | no (download from UCSC) | 87.053% (2793773646 bp)                                             |                                                       |
| panPan1    | Bonobo                   | Pan paniscus                   | syntenic          | no (download from UCSC) | 86.857% (2787476067 bp)                                             | not in UCSC 100-way but in the UCSC primate alignment |
| gorGor3    | Gorilla                  | Gorilla gorilla gorilla        | syntenic          | no (download from UCSC) | 81.109% (2603032702 bp)                                             |                                                       |
| ponAbe2    | Orangutan                | Pongo pygmaeus abelii          | syntenic          | no (download from UCSC) | 81.790% (2624886526 bp)                                             |                                                       |
| nomLeu3    | Gibbon                   | Nomascus leucogenys            | syntenic          | no (download from UCSC) | 80.404% (2580390048 bp)                                             |                                                       |
| rheMac3    | Rhesus                   | Macaca mulatta                 | syntenic          | no (download from UCSC) | 75.857% (2434452580 bp)                                             |                                                       |
| macFas5    | Crab-eating macaque      | Macaca fascicularis            | syntenic          | no (download from UCSC) | 80.148% (2572180197 bp)                                             |                                                       |
| papAnu2    | Baboon                   | Papio anubis                   | syntenic          | no (download from UCSC) | 78.855% (2530680298 bp)                                             |                                                       |
| chlSab2    | Green monkey             | Chlorocebus sabaeus            | syntenic          | no (download from UCSC) | 79.547% (2552877571 bp)                                             |                                                       |
| nasLar1    | Proboscis monkey         | Nasalis larvatus               | syntenic          | no (download from UCSC) | 59.926% (1923212200 bp)                                             | not in UCSC 100-way but in the UCSC primate alignment |
| rhiRox1    | Golden snub-nosed monkey | Rhinopithecus roxellana        | syntenic          | no (download from UCSC) | 79.578% (2553881926 bp)                                             | not in UCSC 100-way but in the UCSC primate alignment |
| calJac3    | Marmoset                 | Callithrix jacchus             | syntenic          | no (download from UCSC) | 67.510% (2166594286 bp)                                             |                                                       |
| saiBol1    | Squirrel monkey          | Saimiri boliviensis            | syntenic          | no (download from UCSC) | 66.644% (2138792419 bp)                                             | not in UCSC 100-way but in the UCSC primate alignment |
| tarSyr2    | Tarsier                  | Tarsius syrichta               | syntenic          | no (download from UCSC) | 53.523% (1717714322 bp)                                             |                                                       |
| otoGar3    | Bushbaby                 | Otolemur garnettii             | syntenic          | no (download from UCSC) | 51.911% (1665976796 bp)                                             |                                                       |
| micMur2    | Mouse lemur              | Microcebus murinus             | syntenic          | yes                     | 54.845% (1760139027 bp)                                             | assembly updated (micMur1)                            |
| tupChi1    | Chinese tree shrew       | Tupaia chinensis               | syntenic          | no (download from UCSC) | 44.085% (1414807345 bp)                                             | is in UCSC primate alignment                          |
| speTri2    | Squirrel                 | Spermophilus tridecemlineatus  | syntenic          | yes                     | 48.520% (1557148621 bp)                                             |                                                       |
| jacJac1    | Lesser Egyptian jerboa   | Jaculus jaculus                | syntenic          | yes                     | 34.884% (1119528205 bp)                                             |                                                       |
| micOch1    | Prairie vole             | Microtus ochrogaster           | syntenic          | yes                     | 32.532% (1040408968 bp)                                             |                                                       |
| perManBai1 | Prairie deer mouse       | Peromyscus maniculatus bairdii | syntenic          | yes                     | 36.198% (1161713393 bp)                                             | species added                                         |
| criGri1    | Chinese hamster          | Cricetulus griseus             | syntenic          | yes                     | 34.265% (1099649614 bp)                                             |                                                       |
| mesAur1    | Golden hamster           | Mesocricetus auratus           | syntenic          | yes                     | 31.228% (1002208949 bp)                                             |                                                       |
| mm10       | Mouse                    | Mus musculus                   | syntenic          | yes                     | 32.896% (1055730834 bp)                                             |                                                       |
| rn6        | Rat                      | Rattus norvegicus              | syntenic          | yes                     | 32.261% (1035338911 bp)                                             |                                                       |
| nanGal1    | Blind mole rat           | Nannosipalax galii             | syntenic          | yes                     | 39.773% (1276420898 bp)                                             | species added                                         |
| hetGla2    | Naked mole-rat           | Heterocephalus glaber          | syntenic          | yes                     | 46.886% (1504708927 bp)                                             |                                                       |
| cavPor3    | Guinea pig               | Cavia porcellus                | syntenic          | yes                     | 43.503% (1396146209 bp)                                             |                                                       |
| chilAn1    | Chinchilla               | Chinchilla lanigera            | syntenic          | yes                     | 46.489% (1491948983 bp)                                             |                                                       |
| octDeg1    | Brush-tailed rat         | Octodon degus                  | syntenic          | yes                     | 41.127% (1319878019 bp)                                             |                                                       |
| oryCun2    | Rabbit                   | Oryctolagus cuniculus          | syntenic          | yes                     | 43.445% (1394260530 bp)                                             |                                                       |
| ochPri3    | Pika                     | Ochotona princeps              | syntenic          | yes                     | 34.458% (1105866449 bp)                                             |                                                       |
| susScr3    | Pig                      | Sus scrofa                     | syntenic          | yes                     | 43.977% (1411351436 bp)                                             |                                                       |
| vicPac2    | Alpaca                   | Vicugna pacos                  | syntenic          | yes                     | 47.915% (1537730338 bp)                                             |                                                       |
| camFer1    | Bactrian camel           | Camelus ferus                  | syntenic          | yes                     | 48.351% (1551735184 bp)                                             |                                                       |
| turTru2    | Dolphin                  | Tursiops truncatus             | min score 100k    | yes                     | 48.411% (1553639543 bp)                                             |                                                       |
| orcOrc1    | Killer whale             | Orcinus orca                   | syntenic          | yes                     | 49.937% (1602606513 bp)                                             |                                                       |
| phyCat1    | Sperm whale              | Physeter catodon               | min score 100k    | yes                     | 50.800% (1630320179 bp)                                             | species added                                         |
| balAcu1    | Minke whale              | Balaenoptera acutorostrata     | syntenic          | yes                     | 50.799% (1630272577 bp)                                             | species added                                         |
| panHod1    | Tibetan antelope         | Pantholops hodgsonii           | syntenic          | yes                     | 45.582% (1462842254 bp)                                             |                                                       |
| bosTau8    | Cow                      | Bos taurus                     | syntenic          | yes                     | 45.834% (1470932026 bp)                                             |                                                       |
| bisBis1    | Bison                    | Bison bison bison              | syntenic          | yes                     | 44.359% (1423605716 bp)                                             | species added                                         |
| oviAri3    | Sheep                    | Ovis aries                     | syntenic          | yes                     | 45.517% (1460762110 bp)                                             |                                                       |
| capHir1    | Domestic goat            | Capra hircus                   | syntenic          | yes                     | 45.000% (1444182511 bp)                                             |                                                       |
| equCab2    | Horse                    | Equus caballus                 | syntenic          | yes                     | 54.276% (1741862725 bp)                                             |                                                       |
| cerSim1    | Rhinoceros               | Ceratotherium simum            | syntenic          | yes                     | 55.225% (1772316407 bp)                                             |                                                       |
| felCat8    | Cat                      | Felis catus                    | syntenic          | yes                     | 51.061% (1638680977 bp)                                             |                                                       |
| canFam3    | Dog                      | Canis lupus familiaris         | syntenic          | yes                     | 50.326% (1615105515 bp)                                             |                                                       |
| musFur1    | Ferret                   | Mustela putorius furo          | syntenic          | yes                     | 49.359% (1584081766 bp)                                             |                                                       |
| ailMel1    | Panda                    | Ailuropoda melanoleuca         | syntenic          | yes                     | 51.345% (1647822381 bp)                                             |                                                       |
| ursMar1    | Polar bear               | Ursus maritimus                | syntenic          | yes                     | 51.593% (1655756012 bp)                                             | species added                                         |
| odoRosDiv1 | Pacific walrus           | Odobenus rosmarus divergens    | syntenic          | yes                     | 51.621% (1656658543 bp)                                             |                                                       |
| lepWed1    | Weddell seal             | Leptonychotes weddellii        | min score 100k    | yes                     | 50.883% (1632970808 bp)                                             |                                                       |
| manPen1    | Chinese pangolin         | Manis pentadactyla             | min score 100k    | yes                     | 44.856% (1439551201 bp)                                             | species added                                         |
| pteAle1    | Black flying-fox         | Pteropus alecto                | syntenic          | yes                     | 47.629% (1528548624 bp)                                             |                                                       |
| pteVam1    | Megabat                  | Pteropus vampyrus              | min score 100k    | yes                     | 42.944% (1378203172 bp)                                             |                                                       |
| eptFus1    | Big brown bat            | Eptesicus fuscus               | syntenic          | yes                     | 38.604% (1238910861 bp)                                             |                                                       |
| myoDav1    | Dauids myotis bat        | Myotis davidii                 | syntenic          | yes                     | 37.842% (1214472498 bp)                                             |                                                       |
| myoLuc2    | Microbat                 | Myotis lucifugus               | syntenic          | yes                     | 37.922% (1217018404 bp)                                             |                                                       |
| eriEur2    | Hedgehog                 | Erinaceus europaeus            | syntenic          | yes                     | 25.506% (818548418 bp)                                              |                                                       |
| sorAra2    | Shrew                    | Sorex araneus                  | syntenic          | yes                     | 27.284% (875607470 bp)                                              |                                                       |
| conCnr1    | Star-nosed mole          | Condylura cristata             | syntenic          | yes                     | 36.794% (1180817074 bp)                                             |                                                       |
| loxAfr3    | Elephant                 | Loxodonta africana             | syntenic          | yes                     | 44.849% (1439316697 bp)                                             |                                                       |
| eleEdw1    | Cape elephant shrew      | Elephantulus edwardii          | syntenic          | yes                     | 27.037% (867708181 bp)                                              |                                                       |
| triMan1    | Manatee                  | Trichechus manatus latirostris | syntenic          | yes                     | 44.578% (1430630850 bp)                                             |                                                       |
| chrAs1     | Cape golden mole         | Chrysochloris asiatica         | syntenic          | yes                     | 33.343% (1070066279 bp)                                             |                                                       |
| echTel2    | Tenrec                   | Echinops telfairi              | syntenic          | yes                     | 29.651% (951570829 bp)                                              |                                                       |
| oryAfe1    | Aardvark                 | Orycteropus afer afer          | syntenic          | yes                     | 40.029% (1284635867 bp)                                             |                                                       |
| dasNov3    | Armadillo                | Dasypus novemcinctus           | syntenic          | yes                     | 45.058% (1446055144 bp)                                             |                                                       |
| monDom5    | Opossum                  | Monodelphis domestica          | min score 10k     | yes                     | 16.439% (527575746 bp)                                              |                                                       |
| sarHar1    | Tasmanian devil          | Sarcophilus harrisii           | min score 10k     | yes                     | 13.527% (434129438 bp)                                              |                                                       |
| macEug2    | Wallaby                  | Macropus eugenii               | min score 10k     | yes                     | 9.786% (314070130 bp)                                               |                                                       |
| ornAna2    | Platypus                 | Ornithorhynchus anatinus       | min score 10k     | yes                     | 7.610% (244238785 bp)                                               | assembly updated                                      |

**Supplementary Table 1 (part 1): All mammals included in the 144-vertebrate alignment.**

| Assembly  | Species                  | Scientific name              | Net type      | Alignment computed | % of human (hg38) genome in aligning blocks containing this species | Notes         |
|-----------|--------------------------|------------------------------|---------------|--------------------|---------------------------------------------------------------------|---------------|
| zonAlb1   | White-throated sparrow   | Zonotrichia albicollis       | min score 10k | yes                | 4.886% (156805456 bp)                                               |               |
| geoFor1   | Medium ground finch      | Geospiza fortis              | min score 10k | yes                | 4.862% (156033541 bp)                                               |               |
| serCan1   | Canary                   | Serinus canaria              | min score 10k | yes                | 5.188% (166499082 bp)                                               | species added |
| taeGut2   | Zebra finch              | Taeniopygia guttata          | min score 10k | yes                | 6.621% (212475807 bp)                                               |               |
| ficAlb2   | Collared flycatcher      | Ficedula albicollis          | min score 10k | yes                | 5.350% (171700154 bp)                                               |               |
| pseHum1   | Tibetan ground jay       | Pseudopodoces humilis        | min score 10k | yes                | 5.494% (176307062 bp)                                               |               |
| corCor1   | Hooded crow              | Corvus cornix cornix         | min score 10k | yes                | 4.878% (156535011 bp)                                               | species added |
| corBra1   | American crow            | Corvus brachyrhynchos        | min score 10k | yes                | 4.936% (158418176 bp)                                               | species added |
| manVit1   | Golden-collared manakin  | Manacus vitellinus           | min score 10k | yes                | 4.835% (155178743 bp)                                               | species added |
| melUnd1   | Budgerigar               | Melopsittacus undulatus      | min score 10k | yes                | 4.955% (159020493 bp)                                               |               |
| amaVit1   | Parrot                   | Amazona vittata              | min score 10k | yes                | 3.852% (123631020 bp)                                               |               |
| araMac1   | Scarlet macaw            | Ara macao                    | min score 10k | yes                | 3.409% (109406414 bp)                                               |               |
| falPer1   | Peregrine falcon         | Falco peregrinus             | min score 10k | yes                | 5.165% (165758579 bp)                                               |               |
| falChe1   | Saker falcon             | Falco cherrug                | min score 10k | yes                | 5.121% (164335455 bp)                                               |               |
| picPub1   | Downy woodpecker         | Picoides pubescens           | min score 10k | yes                | 4.380% (140552870 bp)                                               | species added |
| halLeu1   | Bald eagle               | Haliaeetus leucocephalus     | min score 10k | yes                | 5.548% (178055539 bp)                                               | species added |
| aquChr2   | Golden eagle             | Aquila chrysaetos canadensis | min score 10k | yes                | 5.646% (181199086 bp)                                               | species added |
| egrGar1   | Little egret             | Egretta garzetta             | min score 10k | yes                | 4.892% (157004660 bp)                                               | species added |
| nipNip1   | Crested ibis             | Nipponia nippon              | min score 10k | yes                | 5.320% (170743201 bp)                                               | species added |
| pygAde1   | Adelie penguin           | Pygoscelis adeliae           | min score 10k | yes                | 4.881% (156644132 bp)                                               | species added |
| aptFor1   | Emperor penguin          | Aptenodytes forsteri         | min score 10k | yes                | 5.251% (168523562 bp)                                               | species added |
| chaVoc2   | Killdeer                 | Charadrius vociferus         | min score 10k | yes                | 4.954% (158985295 bp)                                               | species added |
| opiHoa1   | Hoatzin                  | Opisthocomus hoazin          | min score 10k | yes                | 4.589% (147272093 bp)                                               | species added |
| calAnn1   | Anna's hummingbird       | Calypte anna                 | min score 10k | yes                | 4.794% (153857566 bp)                                               | species added |
| cucCan1   | Common cuckoo            | Cuculus canorus              | min score 10k | yes                | 4.934% (158337416 bp)                                               | species added |
| colLiv1   | Rock pigeon              | Columba livia                | min score 10k | yes                | 4.956% (159057555 bp)                                               |               |
| galGal4   | Chicken                  | Gallus gallus                | min score 10k | yes                | 5.308% (170335631 bp)                                               |               |
| melGal1   | Turkey                   | Meleagris gallopavo          | min score 10k | yes                | 5.675% (182131850 bp)                                               |               |
| anaPla1   | Mallard duck             | Anas platyrhynchos           | min score 10k | yes                | 4.551% (146045350 bp)                                               |               |
| tinGut2   | White throated tinamou   | Tinamus guttatus             | min score 10k | yes                | 4.413% (141615668 bp)                                               | species added |
| strCam1   | Ostrich                  | Struthio camelus australis   | min score 10k | yes                | 4.929% (158185647 bp)                                               | species added |
| allMis1   | American alligator       | Alligator mississippiensis   | min score 10k | yes                | 6.788% (217838578 bp)                                               |               |
| gavGan0   | Gharial                  | Gavialis gangeticus          | min score 10k | yes                | 6.814% (218675397 bp)                                               | species added |
| cheMy1    | Green sea turtle         | Chelonia mydas               | min score 10k | yes                | 6.978% (223955076 bp)                                               |               |
| chrPic2   | Painted turtle           | Chrysemys picta bellii       | min score 10k | yes                | 7.363% (236301642 bp)                                               |               |
| pelSin1   | Chinese softshell turtle | Pelodiscus sinensis          | min score 10k | yes                | 5.867% (188280315 bp)                                               |               |
| apaSpi1   | Spiny softshell turtle   | Apalone spinifera            | min score 10k | yes                | 4.275% (137184865 bp)                                               |               |
| anoCar2   | Lizard                   | Anolis carolinensis          | min score 10k | yes                | 4.015% (128844558 bp)                                               |               |
| pytBiv1   | Burmese python           | Python bivittatus            | min score 10k | yes                | 4.079% (130897768 bp)                                               | species added |
| HLupMer3  | Tupinambis               | Tupinambis merianae          | min score 10k | yes                | 4.365% (140100325 bp)                                               | species added |
| xenTro7   | X. tropicalis            | Xenopus tropicalis           | min score 10k | yes                | 3.586% (115088552 bp)                                               |               |
| nanPar1   | Tibetan frog             | Nanorana parkeri             | min score 10k | yes                | 2.542% (81588078 bp)                                                | species added |
| latCha1   | Coelacanth               | Latimeria chalumnae          | min score 10k | yes                | 2.746% (88116320 bp)                                                |               |
| oreNil2   | Nile tilapia             | Oreochromis niloticus        | min score 10k | yes                | 1.686% (54123951 bp)                                                |               |
| neoBri1   | Princess of Burundi      | Neolamprologus brichardi     | min score 10k | yes                | 1.581% (50742798 bp)                                                |               |
| hapBur1   | Burton's mouthbreeder    | Haplochromis burtoni         | min score 10k | yes                | 1.598% (51290353 bp)                                                |               |
| mayZeb1   | Zebra mbuna              | Maylandia zebra              | min score 10k | yes                | 1.625% (52156056 bp)                                                |               |
| punNye1   | Pundamilia nyererei      | Pundamilia nyererei          | min score 10k | yes                | 1.605% (51494905 bp)                                                |               |
| stePar1   | Bicolor damselfish       | Stegastes partitus           | min score 10k | yes                | 1.586% (50913521 bp)                                                | species added |
| oryLat2   | Medaka                   | Oryzias latipes              | min score 10k | yes                | 1.727% (55412849 bp)                                                |               |
| xipMac1   | Southern platyfish       | Xiphophorus maculatus        | min score 10k | yes                | 1.692% (54285951 bp)                                                |               |
| poeFor1   | Amazon molly             | Poecilia formosa             | min score 10k | yes                | 1.696% (54436979 bp)                                                | species added |
| poeRet1   | Guppy                    | Poecilia reticulata          | min score 10k | yes                | 1.670% (53610154 bp)                                                | species added |
| cypVar1   | Sheepshead minnow        | Cyprinodon variegatus        | min score 10k | yes                | 1.750% (56170064 bp)                                                | species added |
| HLnotFur1 | Turquoise killifish      | Nothobranchius furzeri       | min score 10k | yes                | 1.788% (57377141 bp)                                                | species added |
| gasAcu1   | Stickleback              | Gasterosteus aculeatus       | min score 10k | yes                | 1.750% (56160799 bp)                                                |               |
| notCor1   | Black rockcod            | Notothenia coriiceps         | min score 10k | yes                | 1.481% (47531241 bp)                                                | species added |
| dicLab1   | European sea bass        | Dicentrarchus labrax         | min score 10k | yes                | 1.681% (53952519 bp)                                                | species added |
| tetNig2   | Tetraodon                | Tetraodon nigroviridis       | min score 10k | yes                | 1.526% (48980179 bp)                                                |               |
| fr3       | Fugu                     | Takifugu rubripes            | min score 10k | yes                | 1.545% (49590257 bp)                                                |               |
| takFla1   | Yellowbelly pufferfish   | Takifugu flavidus            | min score 10k | yes                | 1.332% (42753135 bp)                                                |               |
| cynSem1   | Tongue sole              | Cynoglossus semilaevis       | min score 10k | yes                | 1.564% (50179432 bp)                                                | species added |
| gadMor1   | Atlantic cod             | Gadus morhua                 | min score 10k | yes                | 1.297% (41631253 bp)                                                |               |
| esoLuc1   | Northern pike            | Esox lucius                  | min score 10k | yes                | 1.793% (57537814 bp)                                                | species added |
| danRer10  | Zebrafish                | Danio rerio                  | min score 10k | yes                | 3.312% (106303948 bp)                                               |               |
| astMex1   | Astyanax mexicanus       | Mexican tetra                | min score 10k | yes                | 1.882% (60394303 bp)                                                |               |
| lepOcu1   | Spotted gar              | Lepisosteus oculatus         | min score 10k | yes                | 2.505% (80391398 bp)                                                |               |
| calMil1   | Elephant shark           | Callorhynchus milii          | min score 10k | yes                | 2.619% (84038668 bp)                                                | species added |
| petMar2   | Lamprey                  | Petromyzon marinus           | min score 10k | yes                | 1.032% (33115344 bp)                                                |               |
| letCam1   | Arctic lamprey           | Lethenteron camtschaticum    | min score 10k | yes                | 1.198% (38460097 bp)                                                | species added |

**Supplementary Table 1 (part 2):** All non-mammalian genomes included in our 144-vertebrate alignment.

The table lists all species, alignment net filtering thresholds, for which species we computed alignments, percentage and absolute number of bases in the human genome in aligning blocks that include this species, and which species we added compared to the UCSC hg38 100-way alignment.

| runtime in CPU hours |                        |        |                  |            | runtime in CPU hours |                          |              |                  |             |
|----------------------|------------------------|--------|------------------|------------|----------------------|--------------------------|--------------|------------------|-------------|
| Assembly             | Species name           | lastz  | highly sensitive |            | Assembly             | Species name             | lastz        | highly sensitive |             |
|                      |                        |        | chaining         | alignments |                      |                          |              | chaining         | alignments  |
| micMur2              | Mouse_lemur            | 134.3  | 8                | -          | corBra1              | American_crow            | 477.8        | 1.8              | 20.5        |
| speTri2              | Squirrel               | 998.7  | 14.9             | -          | manVit1              | Golden_collared_manakin  | 494.2        | 2                | 21.4        |
| jacJac1              | Lesser_Egyptian_jerboa | 1038.1 | 25.4             | -          | melUnd1              | Budgerigar               | 450.7        | 2.3              | 41.4        |
| micOch1              | Prairie_vole           | 1134.4 | 70.8             | -          | amaVit1              | Parrot                   | 465.6        | 2.1              | 7           |
| perManBai1           | Prairie_deer_mouse     | 1183.5 | 65.3             | -          | araMac1              | Scarlet_macaw            | 436.8        | 1.7              | 5.6         |
| criGri1              | Chinese_hamster        | 1269.7 | 123.3            | -          | falPer1              | Peregrine_falcon         | 446.4        | 2                | 21          |
| mesAur1              | Golden_hamster         | 1049.1 | 51.1             | -          | falChe1              | Saker_falcon             | 545.2        | 2                | 20.2        |
| mm10                 | Mouse                  | 1001.2 | 8.9              | -          | picPub1              | Downy_woodpecker         | 427.7        | 1.8              | 16.4        |
| rn6                  | Rat                    | 1180.5 | 127.5            | -          | halLeu1              | Bald_eagle               | 470.7        | 2.5              | 48.4        |
| nanGal1              | Blind_mole_rat         | 896.8  | 12.6             | -          | aguChr2              | Golden_eagle             | 472.9        | 2.1              | 25.4        |
| hetGla2              | Naked_mole_rat         | 1068.8 | 15.9             | -          | egrGar1              | Little_egret             | 445.2        | 2.3              | 19.3        |
| cavPor3              | Guinea_pig             | 1412.2 | 29.8             | -          | nipNip1              | Crested_ibis             | 467          | 1.8              | 21.8        |
| chiLan1              | Chinchilla             | 1033   | 15.1             | -          | pygAde1              | Adelie_penguin           | 571.8        | 1.8              | 18.7        |
| octDeg1              | Brush_tailed_rat       | 1256.1 | 19.4             | -          | aptFor1              | Emperor_penguin          | 453.4        | 2                | 22          |
| oryCun2              | Rabbit                 | 927    | 15.2             | -          | chaVoc2              | Killdeer                 | 475.3        | 2.6              | 20.4        |
| ochPri3              | Pika                   | 860.4  | 17.7             | -          | opiHoa1              | Hoatzin                  | 439.9        | 2.3              | 20.5        |
| susScr3              | Pig                    | 952.8  | 13.9             | -          | calAnn1              | Annas_hummingbird        | 450.2        | 2.2              | 45.6        |
| vicPac2              | Alpaca                 | 849.7  | 13.8             | -          | cucCan1              | Common_cuckoo            | 532.5        | 2.6              | 21.5        |
| camFer1              | Bactrian_camel         | 870.5  | 22.7             | -          | colLiv1              | Rock_pigeon              | 459.5        | 2.1              | 20.3        |
| turTru2              | Dolphin                | 843.9  | 7.8              | -          | galGal4              | Chicken                  | 414.4        | 5.1              | 74.8        |
| orcOrc1              | Killer_whale           | 1011.7 | 99.2             | -          | melGal1              | Turkey                   | 620.8        | 2.5              | 28.9        |
| phyCat1              | Sperm_whale            | 908.1  | 20.1             | -          | anaPla1              | Mallard_duck             | 424.5        | 1.8              | 15.9        |
| balAcu1              | Minke_whale            | 926.1  | 30.8             | -          | tinGut2              | White_throated_tinamou   | 431.7        | 2                | 13.1        |
| panHod1              | Tibetan_antelope       | 1075.4 | 32               | -          | strCam1              | Ostrich                  | 474.7        | 2.4              | 18.7        |
| bosTau8              | Cow                    | 1028.7 | 41               | -          | allMis1              | American_alligator       | 838.5        | 5.9              | 49.9        |
| bisBis1              | Bison                  | 1003   | 30.6             | -          | gavGan0              | Gharial                  | 1550.7       | 337.2            | 435.2       |
| oviAri3              | Sheep                  | 1042.4 | 45.6             | -          | cheMyd1              | Green_seaturtle          | 789.4        | 12.1             | 45.6        |
| capHir1              | Domestic_goat          | 1049   | 49.6             | -          | chrPic2              | Painted_turtle           | 1151.3       | 8.4              | 64.3        |
| equCab2              | Horse                  | 1052.7 | 29.1             | -          | pelSin1              | Chinese_softshell_turtle | 660.5        | 5.1              | 39.6        |
| cerSim1              | White_rhinoceros       | 1025.5 | 10.2             | -          | apaSpi1              | Spiny_softshell_turtle   | 637.6        | 3.9              | 24.6        |
| felCat8              | Cat                    | 980.4  | 55.5             | -          | anoCar2              | Lizard                   | 545.2        | 19               | 72          |
| canFam3              | Dog                    | 966.6  | 17.6             | -          | pytBiv1              | Burmese_python           | 638.4        | 13.3             | 31.8        |
| musFur1              | Ferret                 | 947.1  | 26.7             | -          | HLtupMer3            | Tupinambis               | 856.3        | 7.8              | 78.1        |
| ailMel1              | Panda                  | 854    | 3.6              | -          | xenTro7              | X_tropicalis             | 704.2        | 80.4             | 148.9       |
| ursMar1              | Polar_bear             | 935.8  | 39.3             | -          | nanPar1              | Tibetan_frog             | 600.3        | 6.4              | 33          |
| odoRosDiv1           | Pacific_walrus         | 1000.1 | 43.4             | -          | latCha1              | Coelacanth               | 586          | 4.8              | 17.8        |
| lepWed1              | Weddell_seal           | 887.5  | 28.3             | -          | oreNil2              | Nile_tilapia             | 275.3        | 2.3              | 11.2        |
| manPen1              | Chinese_pangolin       | 919.8  | 20.1             | -          | neoBri1              | Princess_of_Burundi      | 227.7        | 1.6              | 8.2         |
| pteAle1              | Black_flying_fox       | 972.5  | 47.3             | -          | hapBur1              | Burtons_mouthbreeder     | 270.6        | 1.8              | 26.4        |
| pteVam1              | Megabat                | 808.3  | 9.3              | -          | mayZeb1              | Zebra_mbuna              | 256          | 1.7              | 8.6         |
| eptFus1              | Big_brown_bat          | 894.9  | 26.9             | -          | punNye1              | Pundamilia_nyererei      | 232.1        | 1.6              | 8.4         |
| myoDav1              | Dauids_myotis_bat      | 948.7  | 46.7             | -          | stePar1              | Bicolor_damselfish       | 255.9        | 1.3              | 7           |
| myoLuc2              | Microbat               | 834.6  | 9.2              | -          | oryLat2              | Medaka                   | 203.4        | 3                | 12.2        |
| eriEur2              | Hedgehog               | 908.3  | 36.5             | -          | xipMac1              | Southern_platyfish       | 209          | 1.8              | 8.6         |
| sorAra2              | Shrew                  | 1138.2 | 101              | -          | poeFor1              | Amazon_molly             | 271.3        | 2.6              | 23.4        |
| conCri1              | Star_nosed_mole        | 947.9  | 15.2             | -          | poeRet1              | Guppy                    | 234.4        | 4.9              | 15.4        |
| loxAfr3              | Elephant               | 1141.8 | 18.8             | -          | cypVar1              | Sheepshead_minnow        | 279.9        | 1.9              | 10.9        |
| eleEdw1              | Cape_elephant_shrew    | 834.8  | 10.1             | -          | HLnotFur1            | Turquoise_killifish      | 373.6        | 11               | 21.3        |
| triMan1              | Manatee                | 1098.3 | 17.2             | -          | gasAcu1              | Stickleback              | 229.9        | 2.3              | 10.5        |
| chrAsi1              | Cape_golden_mole       | 1655.5 | 30.1             | -          | notCor1              | Black_rockcod            | 204.8        | 1.3              | 5.7         |
| echTel2              | Tenrec                 | 1152.4 | 36.3             | -          | dicLab1              | European_sea_bass        | 245.4        | 4.1              | 50.8        |
| oryAfe1              | Aardvark               | 1564.1 | 39               | -          | tetNig2              | Tetraodon                | 97.9         | 1.3              | 7.8         |
| dasNov3              | Armadillo              | 1130.8 | 19.6             | -          | fr3                  | Fugu                     | 132          | 1.1              | 19.3        |
| monDom5              | Opossum                | 1800.8 | 150.3            | 362.1      | takFla1              | Yellowbelly_pufferfish   | 113.9        | 1.1              | 4.8         |
| sarHar1              | Tasmanian_devil        | 913.5  | 10.8             | 59.3       | cynSem1              | Tongue_sole              | 164.3        | 1.3              | 8.4         |
| macEug2              | Wallaby                | 870.8  | 20.8             | 51.7       | gadMor1              | Atlantic_cod             | 182.2        | 1                | 6.3         |
| ornAna2              | Platypus               | 583.4  | 16.4             | 47.9       | esoLuc1              | Northern_pike            | 257.3        | 2.9              | 12.5        |
| zonAlb1              | White_throated_sparrow | 428.7  | 2                | 19.8       | danRer10             | Zebrafish                | 952.5        | 42.2             | 95.4        |
| geoFor1              | Medium_ground_finch    | 444.4  | 2.3              | 22         | astMex1              | Mexican_tetra_cavefish   | 285.6        | 3.8              | 35.6        |
| serCan1              | Canary                 | 478.4  | 3.2              | 26.2       | lepOcu1              | Spotted_gar              | 318.5        | 3.9              | 31.7        |
| taeGut2              | Zebra_finch            | 801.8  | 10.7             | 62.3       | calMil1              | Elephant_shark           | 492          | 63.8             | 104.7       |
| ficAlb2              | Collared_flycatcher    | 476.7  | 10.1             | 52.9       | petMar2              | Lamprey                  | 136.8        | 2.4              | 3.6         |
| pseHum1              | Tibetan_ground_jay     | 467    | 2.4              | 25.3       | letCam1              | Arctic_lamprey           | 206.8        | 1.9              | 5.8         |
| corCor1              | Hooded_crow            | 420.4  | 1.6              | 22.2       |                      |                          |              |                  |             |
|                      |                        |        |                  |            |                      | <b>SUM</b>               | <b>89308</b> | <b>2724</b>      | <b>2946</b> |
|                      |                        |        |                  |            |                      | <b>TOTAL</b>             | <b>94977</b> |                  |             |

**Supplementary Table 2: Runtimes in CPU hours for all pairwise alignments.**

The runtimes of chainCleaner (typically not more than 10 minutes) and the netting step sum to less than 50 CPU hours in total and are not listed here.
